# Supplementary material
Source: PubMed Central journal article supplement (PMC3655078)
Supplement: NIHMS433308-supplement-Supp_Table_S1.pdf [file NIHMS433308-supplement-Supp_Table_S1.pdf]

**Supplemental Table 1.** NTX effects on reward-seeking during brief extinction sessions. Ratios of lever presses after NTX administration to presses after saline were calculated for each rat. All values are mean  $\pm$  SE. A 3-way ANOVA of ratios by dose, reinforcer and schedule yielded no main effects or interactions (all  $F$ 's $<1.4$ ,  $p$ 's $>0.05$ ), indicating that the effect of NTX was similar for each dose across all groups.

|                                | <b>FR5-Alcohol</b> | <b>FR5-Sucrose</b> | <b>VI30-Alcohol</b> | <b>VI30-Sucrose</b> |
|--------------------------------|--------------------|--------------------|---------------------|---------------------|
| Ratio scores for NTX 0.3 mg/kg | 0.6 $\pm$ 0.2      | 0.8 $\pm$ 0.2      | 0.6 $\pm$ 0.1       | 0.7 $\pm$ 0.1       |
| Ratio scores for NTX 1.0 mg/kg | 0.5 $\pm$ 0.1      | 0.9 $\pm$ 0.3      | 0.6 $\pm$ 0.1       | 0.6 $\pm$ 0.1       |
