# Supplementary material
Source: PubMed Central journal article supplement (PMC3655078)
Supplement: NIHMS433308-supplement-Supp_Table_S2.pdf [file NIHMS433308-supplement-Supp_Table_S2.pdf]

**Supplemental Table 2.** Behavior, ethanol dose and blood ethanol concentration (BEC) from rats self-administering 10% ethanol on FR5 and VI30 reinforcement schedules. The two rats from which representative BECs were measured were very similar in behavioral performance of the operant tasks and alcohol dose achieved when compared to the VI30-alcohol and FR5-alcohol groups in the main experiment. Data are presented as mean  $\pm$  SEM.

BEC group (n=2): within subject assessment of BEC after two FR5 sessions and two VI30 sessions:

|                                       | <b>FR5</b>     | <b>VI30</b>    |
|---------------------------------------|----------------|----------------|
| # Reinforcements                      | 25 $\pm$ 0     | 25 $\pm$ 0     |
| Alcohol dose, g/kg                    | 0.5 $\pm$ 0    | 0.5 $\pm$ 0    |
| Time of last press, minutes (Min/Max) | 3.4/7.6        | 13.7/19.8      |
| Average time of last press, minutes   | 5.5 $\pm$ 1.0  | 16.0 $\pm$ 1.4 |
| Average BEC, mg/dl                    | 30.7 $\pm$ 3.8 | 27.3 $\pm$ 4.9 |
| BEC Range, mg/dl (Min/Max)            | 20.1/37.3      | 14.9/38.6      |

Overall group self-administration behavior after saline (data from Figure 1):

|                                       | <b>FR5-Alcohol<br/>(n=16)</b> | <b>FR5-Sucrose<br/>(n=13)</b> | <b>VI30-Alcohol<br/>(n=16)</b> | <b>VI30-Sucrose<br/>(n=15)</b> |
|---------------------------------------|-------------------------------|-------------------------------|--------------------------------|--------------------------------|
| # Reinforcements                      | 23.9 $\pm$ 0.7                | 25 $\pm$ 0                    | 24.1 $\pm$ 0.9                 | 25 $\pm$ 0                     |
| Alcohol dose, g/kg                    | 0.5 $\pm$ 0.02                |                               | 0.5 $\pm$ 0.03                 |                                |
| Time of last press, minutes (Min/Max) | 3.5/29.5                      | 3.3/6.7                       | 14.7/28.6                      | 13.1/25.1                      |
| Median time of last press, minutes    | 8.4                           | 5.4                           | 17.6                           | 18.1                           |
